# Supplementary material for: Transition-metal-free radical homocoupling polymerization to synthesize conjugated poly(phenylene butadiynylene) polymers
Source: Royal Society of Chemistry journal article supplement (doi:10.1039/d1py00266j), 2021-01-01
Supplement: d1py00266j1.pdf [file d1py00266j1.pdf]

## Electronic Supplementary Information

### *Transition-Metal-Free Radical Homocoupling Polymerization to Conjugated Poly(Phenylene butadiynylene) Polymers*

Qingmin Liu, Xuepeng Wang, Bien Tan,\* Shangbin Jin\*

Key Laboratory of Material Chemistry for Energy Conversion and Storage, Ministry of Education,  
School of Chemistry and Chemical Engineering, Huazhong University of Science and Technology  
Luoyu Road No.1037, 430074, Wuhan (China)

\*E-mail: shangbin@xjtu.edu.cn, bien.tan@hust.edu.cn

#### A. General Information

**Materials.** 1, 3, 5-triethynylbenzene, 2, 4, 6-(4-bromophenyl)-1, 3, 5-triazine, Tetrakis(p-bromophenyl)Methane, trimethylsilylacetylene, *N*-Bromosuccinimide, *N,N*-dimethylformamide (DMF), tetrahydrofuran (THF), potassium carbonate, potassium iodide, copper iodide, tetrakis(triphenylphosphine)palladium, acetone, palladium(II)bis(triphenylphosphine) dichloride, diisopropylamine, triethylamine, methanol and absolute ethanol were purchased from Aladdin Chemicals of China and they were used without further purification. The residual element content was determined by inductively coupled plasma mass spectrometry (ICP-MS) 730 equipment produced Agilent.

#### B. Synthesis of Model Compound and Monomers

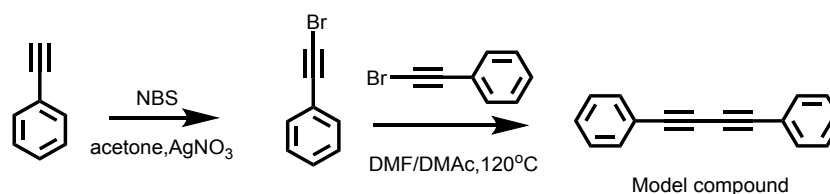

**Scheme S1.** The general synthetic routes of model product.

**Synthesis of model compound.<sup>1</sup>** A mixture of phenylacetylene (1.00 g, 9.80 mmol), *N*-bromosuccinimide (2.62 g, 14.70 mmol) and silver nitrate (0.01 g, 0.06 mmol) dispersed in acetone (25 mL) was stirred for 2 hours at room temperature under black conditions. Removal of the solvent

and purification by column (silica, petroleum ether as eluent) gave 1-bromo-2-phenylacetylene (1.57 g, 88.5%) as yellow oil.  $^1\text{H}$  NMR (400 MHz,  $d\text{-CDCl}_3$ )  $\delta$  = 7.53 (Ar-H), 7.43 (Ar-H), 7.53 (Ar-H) ppm.  $^{13}\text{C}$  NMR (400 MHz,  $d\text{-CDCl}_3$ )  $\delta$  = 132.09 (Ar-C), 128.44 (Ar-C), 122.65 (Ar-C), 80 (Ar-C $\equiv$ -Br), 49.97 ( $\text{--}\equiv\text{C--Br}$ ) ppm.

1-bromo-2-phenylacetylene (0.18 g, 1.00 mmol) and KI (1.00 g, 6.00 mmol) in DMF (2.0 mL) were reacted under stirring at 120 °C for 12 h in a 50 mL round bottom flask. 5 mL water was added and the aqueous solution was extracted with diethyl ether (15 mL), and the combined organic solvent was dried with anhydrous  $\text{MgSO}_4$ . The solvent was removed and the crude product was separated by column chromatography to give a yellow sample (0.098 g, 96.6 %).  $^1\text{H}$  NMR (400 MHz,  $d\text{-CDCl}_3$ )  $\delta$  = 7.46 (Ar-H), 7.29 (Ar-H), 7.19 (Ar-H) ppm.  $^{13}\text{C}$  NMR (400 MHz,  $d\text{-CDCl}_3$ )  $\delta$  = 131.49 (Ar-C), 128.28 (Ar-C), 127.36 (Ar-C), 120.84 (Ar-C), 80.53 (Ar-C $\equiv$ -), 72.86 ( $\text{--}\equiv\text{C--}$ ) ppm.

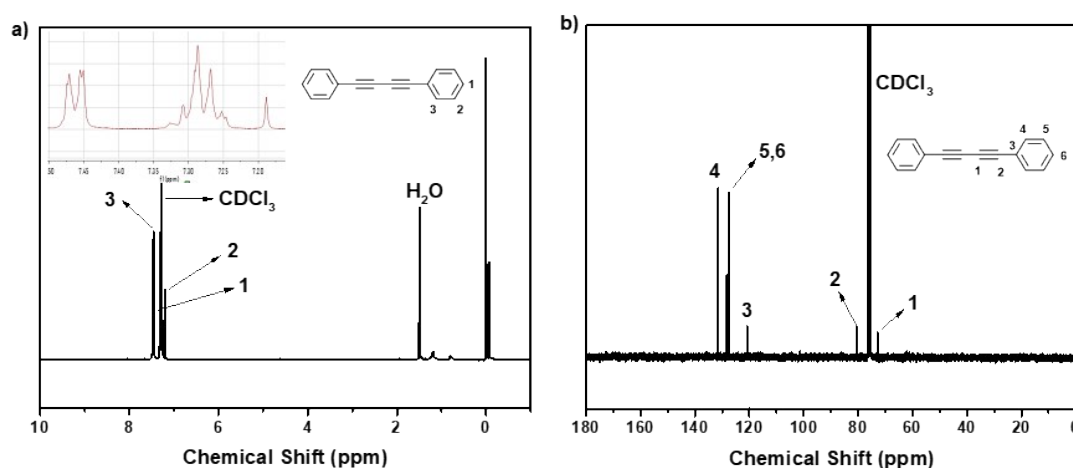

**Figure S1.** a)  $^1\text{H}$  NMR and b)  $^{13}\text{C}$  NMR spectrum of model compound.

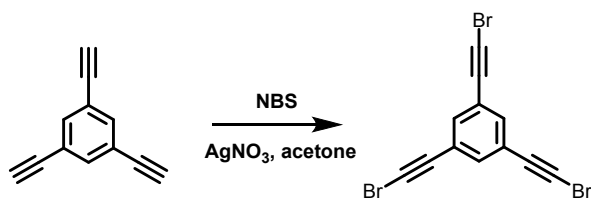

**Scheme S2.** The synthetic routes of 1, 3, 5-tribromoethynylbenzene.

**Synthesis of 1, 3, 5-tribromoethynylbenzene.** A mixture of 1, 3, 5-triethynylbenzene (0.20 g, 1.33 mmol), *N*-bromosuccinimide (0.95 g, 5.34 mmol) and silver nitrate (0.02 g, 0.12 mmol) dispersed in 60 mL acetone was reacted for 24 h at room temperature under black conditions. Removal of the

organic solvent under reduced pressure, purification by column (silica, petroleum ether as eluent) and further dried in vacuum oven at 50 °C for 24 h to yield the target compound as yellow solid (0.49 g, 95.3 %).  $^1\text{H}$  NMR (400 MHz,  $d\text{-CDCl}_3$ )  $\delta$  = 7.48 (3H, Ar-H).  $^{13}\text{C}$  NMR (400 MHz,  $d\text{-CDCl}_3$ )  $\delta$  = 51.5 ( $\text{--C--Br}$ ), 79.7.0 ( $\text{Ar--C}\equiv\text{Br}$ ), 121.9 (Ar-C), 135.8 (Ar-C).

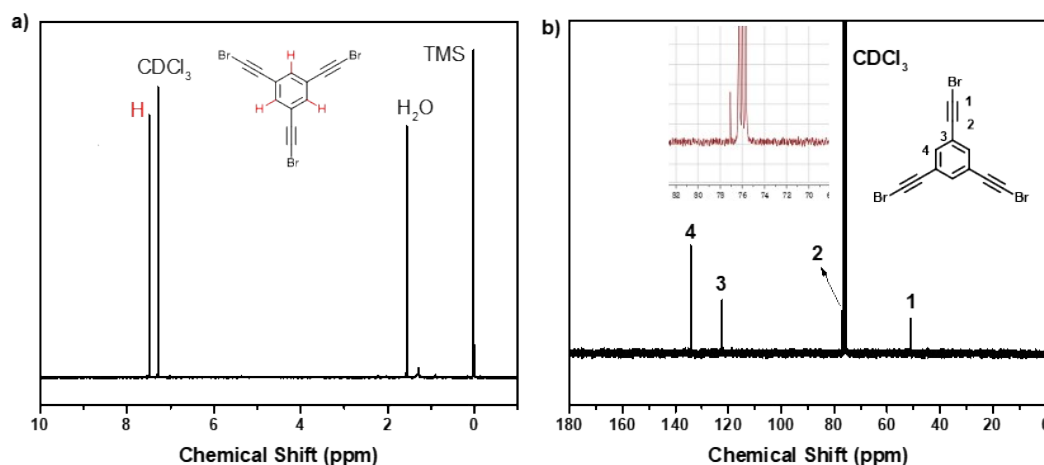

**Figure S2.** a)  $^1\text{H}$  NMR and b)  $^{13}\text{C}$  NMR of 1, 3, 5-tribromoethynylbenzene.

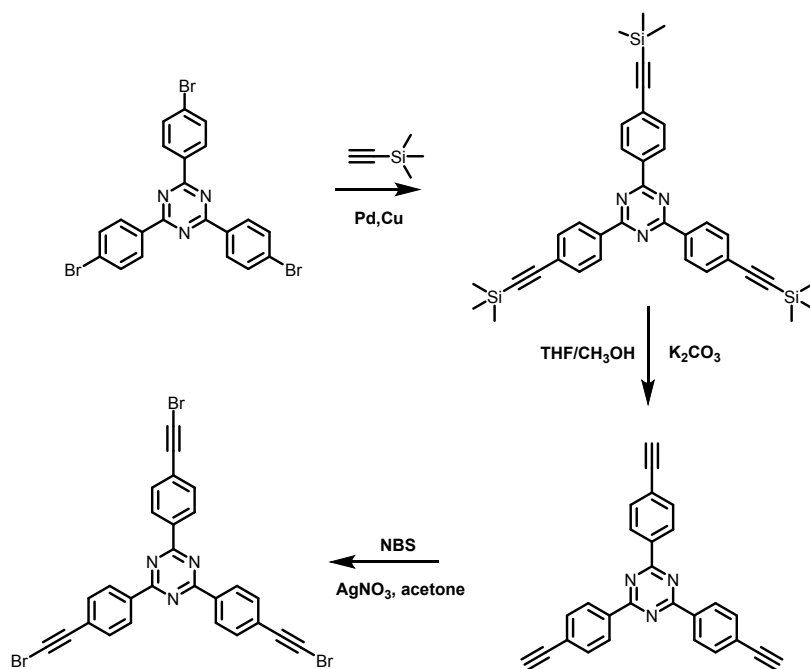

**Scheme S3.** The general synthetic route for 2, 4, 6-tris(4-bromoacetylenephényl)-1, 3, 5-triazine.

**Synthesis of 2, 4, 6-tris(4-[(trimethylsilyl)ethynyl]phenyl)-1, 3, 5-triazine.** Under nitrogen atmosphere, trimethylsilyl ethyne (0.60 mL, 4.25 mmol) was added to a mixture of 2, 4, 6-tris(4-bromophenyl)-1, 3, 5-triazine (0.20 g, 0.41 mmol) dissolved in triethylamine (100 mL). After the addition of tetrakis(triphenylphosphine)-palladium(0) (0.05 g, 0.043 mmol), copper(I) iodide (0.02

g, 0.11 mmol), and the mixture was reacted for 24 h at 80 °C under N<sub>2</sub> atmosphere. The product was extracted with ethyl acetate (3×100 mL) and dried with magnesium sulfate. The organic phase was removed by reduced pressure. The obtained solid was purified by a column (petroleum ether: ethyl acetate, 100:1/V:V), and the product was further recrystallized from CH<sub>2</sub>Cl<sub>2</sub>, yielding a colorless solid (0.23 g, 92.0 %). <sup>1</sup>H NMR (400 MHz, *d*-CDCl<sub>3</sub>):  $\delta$  = 8.77 (6 H, Ar-H), 7.64 (6 H, Ar-H), 0.30 (27 H, Si(CH<sub>3</sub>)<sub>3</sub>) ppm. <sup>13</sup>C NMR (400 MHz, *d*-CDCl<sub>3</sub>):  $\delta$  = 171.02 (triazine-C), 135.73 (Ar-C), 132.22 (Ar-C), 128.75 (Ar-C), 127.43 (Ar-C), 104.76 (Ar-C $\equiv$ C), 97.50 (Ar-C $\equiv$ C), 0.00 (Si(CH<sub>3</sub>)<sub>3</sub>) ppm.

**Synthesis of 2, 4, 6-tris(4-ethynylphenyl)-1, 3, 5-triazine.** A mixture of 2,4,6-tris{4-[(trimethylsilyl)ethynyl]-phenyl}-1,3,5-triazine (0.50 g, 0.84 mmol) and 0.25 g K<sub>2</sub>CO<sub>3</sub> dispersed in THF (50 mL) and methanol (5 mL) was reacted for 24 h at room temperature. The solvent was removed, and obtained solid was extracted with dichloromethane (3×25 mL) and dried with magnesium sulfate. The crude product was purified by a silica column (petroleum ether: ethyl acetate, 100:1/V:V), and further recrystallized from a CH<sub>2</sub>Cl<sub>2</sub>, yielding a white solid (0.29 g, 90.0 %). <sup>1</sup>H NMR (400 MHz, *d*-CDCl<sub>3</sub>):  $\delta$  = 8.64 (6 H, Ar-H), 7.64 (6 H, Ar-H), 3.22 (3 H, -C $\equiv$ CH) ppm. <sup>13</sup>C NMR (400MHz, *d*-CDCl<sub>3</sub>):  $\delta$  = 170.03 (triazine-C), 134.95 (Ar-C), 131.36 (Ar-C), 127.81 (Ar-C), 125.31 (Ar-C), 82.44 (-C $\equiv$ -H), 78.93 (- $\equiv$ CH) ppm.

**Synthesis of 2, 4, 6-tris(4-bromoacetylenophenyl)-1, 3, 5-triazine.** A mixture of 2, 4, 6-tris(4-ethynylphenyl)-1, 3, 5-triazine (0.30 g, 0.79 mmol), *N*-bromosuccinimide (0.70 g, 3.93 mmol) and silver nitrate (0.01 g, 0.06 mmol) dispersed in 60 mL acetone was reacted for 24 h at room temperature under black conditions. The solvent was removed under reduced pressure and the solid was purified by a CC, PE: CH<sub>2</sub>Cl<sub>2</sub> (1:1/V:V) as eluent. The obtained solid was recrystallized from acetone to give the target product as yellowish solid (0.36 g, 73.0%). <sup>1</sup>H NMR (400 MHz, *d*-CDCl<sub>3</sub>)  $\delta$  = 8.75 (6H, Ar-H), 7.74 (6H, Ar-H) ppm. <sup>13</sup>C NMR (400 MHz, *d*-CDCl<sub>3</sub>)  $\delta$  = 171.7 (triazine-C), 122.7-134 (Ar-C), 80.0 (Ar-C $\equiv$ -Br), 49.5 (- $\equiv$ C-Br) ppm.

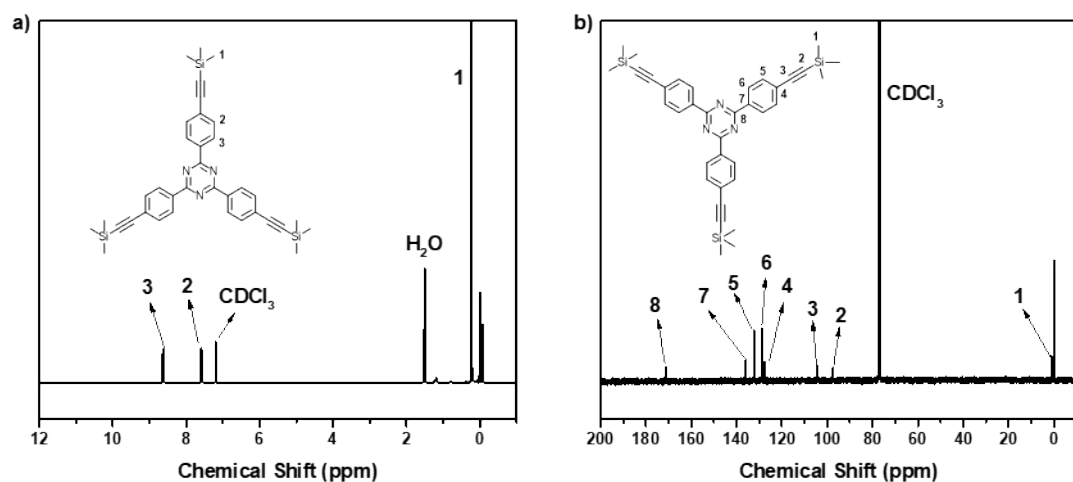

**Figure S3.** a)  $^1\text{H}$  NMR and b)  $^{13}\text{C}$  NMR of 2,4,6-tris(4-[(trimethylsilyl)ethynyl]phenyl)-1,3,5-triazine.

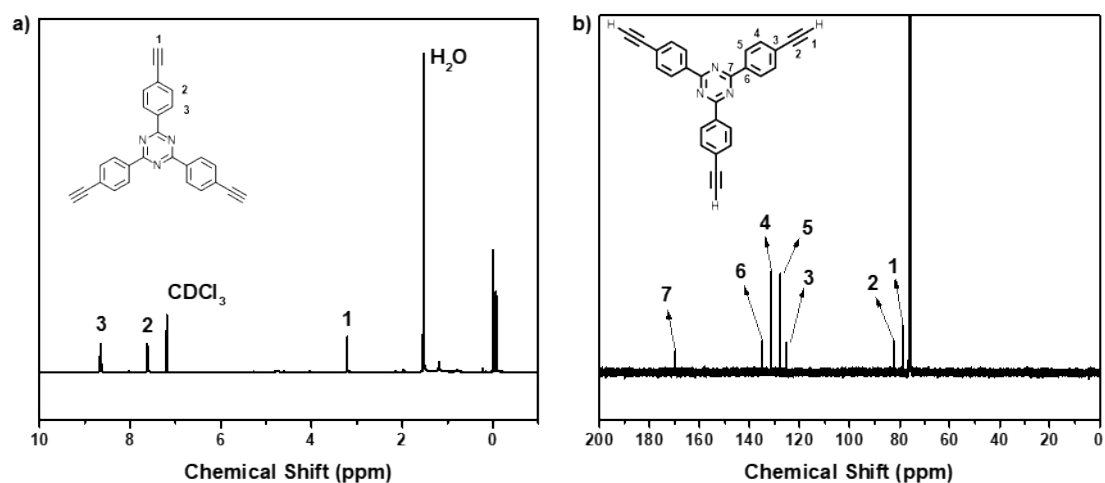

**Figure S4.** a)  $^1\text{H}$  NMR and b)  $^{13}\text{C}$  NMR of 2,4,6-tris(4-ethynylphenyl)-1,3,5-triazine.

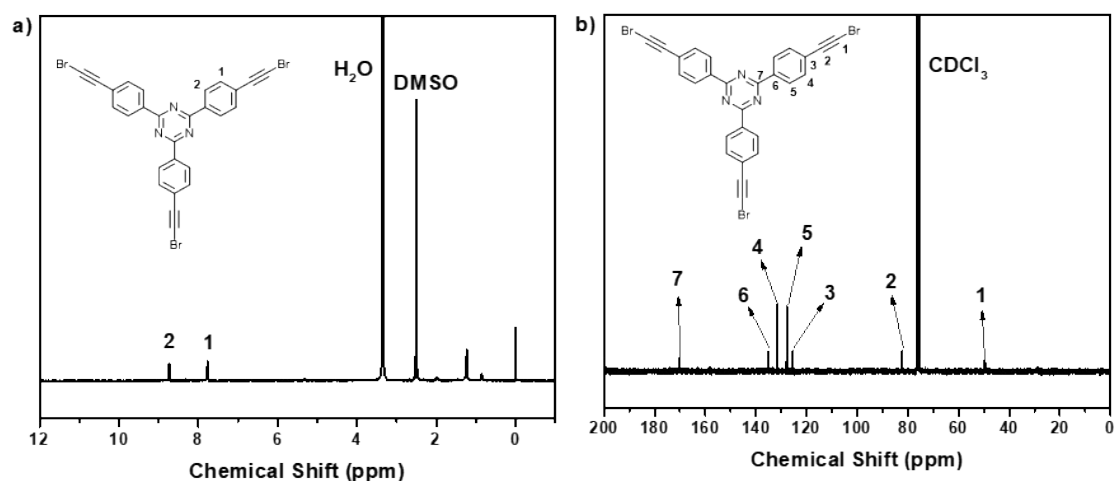

**Figure S5.** a)  $^1\text{H}$  NMR and b)  $^{13}\text{C}$  NMR of 2,4,6-tris(4-bromoacetylenephényl)-1,3,5-triazine.

### C. Synthesis of CMP-KI-1

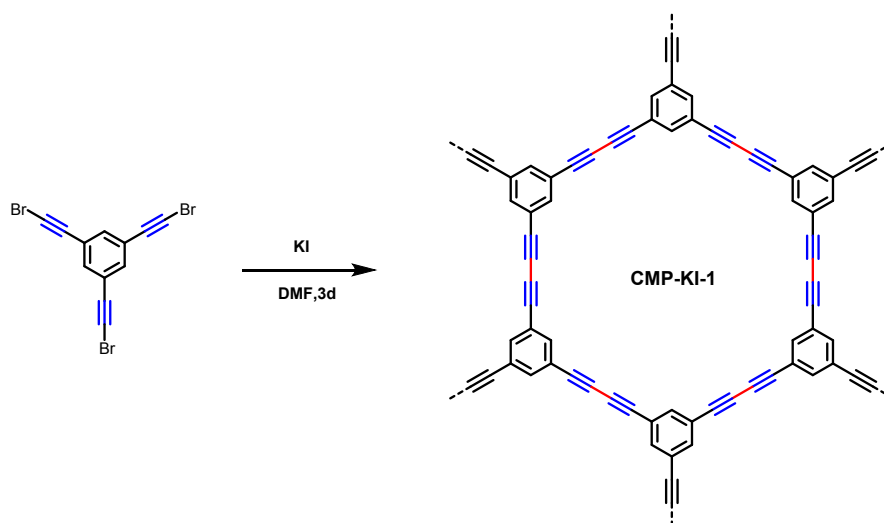

**Synthesis of O-CMP-KI-1 in the open flask system.** 1, 3, 5-tribromoethynylbenzene (0.10 g, 0.26 mmol) and KI (5 g) dissolved in DMAc (2 mL) were reacted at 120 °C for 48 h under ambient condition. After cooling to room temperature, the polymer powder was collected by filtration and washed with water, methanol, DMF, respectively, and further purification by Soxhlet extractor method with THF, methanol, chloroform for 24, respectively. The obtained deep brown solid was dried under vacuum oven at 60 °C for 48 h to give the solid product (0.035 g, 93.1 %).

**Synthesis of S-CMP-KI-1 under solvothermal in the sealed flask.** 1,3,5-tribromoethynylbenzene (0.10g, 0.26 mmol) was added into an 18 cm lass tube, then 0.5 mL DMF was added above-mentioned tube, and sonication for 5 min. 3 g KI was suspended in the mixture. After ultrasonication 10 min, the mixture was degassed by at least three freeze-pump-thaw cycles. The tube was frozen at 77 K (liquid nitrogen bath) and evacuated to high vacuum and flame-sealed. After 150 °C for 72 h, the reaction mixture gave a black solid. After cooled to RT, the tube was broken, and the solid product was filtrated and washed with DMF, CH<sub>3</sub>OH and water, subsequently. The product was further purified by Soxhlet extractor with THF and CH<sub>3</sub>OH as solvents. The final product was dried in vacuum at 60 °C for more than 48 h (0.037 g, 98.4%).

### D. Synthesis of CMP-KI-2

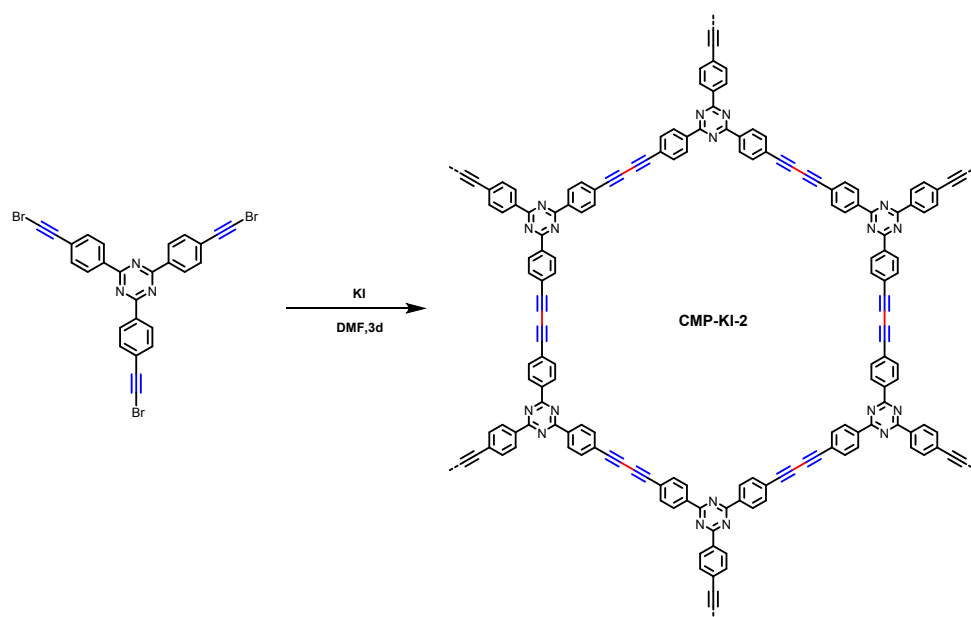

**Synthesis of O-CMP-KI-2 in the open flask system.** 2, 4, 6-Tris(4-bromoacetylenophenyl)-1, 3, 5-triazine (0.1 g, 0.16 mmol) and KI (5 g) dissolved in DMAc (2 mL) was reacted at 120 °C for 72 h. After the system was cooled to room temperature, the polymer sample was collected by filtration and washed with water, methanol, DMF, respectively. The product was further purified by Soxhlet extractor method with THF, methanol, chloroform for 24, respectively. The resulting brown powder was dried under vacuum oven at 60 °C for 48 h to give deep brown solid product (0.055 g, 89.28 %).

**Synthesis of S-CMP-KI-2 under solvothermal method.** The S-CMP-HUST-2 was synthesized according to S-CMP-HUST-1 synthetic process, with 2, 4, 6-Tris(4-bromoacetylenophenyl)-1,3,5-triazine instead of 1,3,5-tribromoethynylbenzene (0.059 g, 95.8 %).

### E. Synthesis conditions optimization of CMP-KI-1 in the open flask system

**Table S1** Synthesis of the O-CMP-KI-1 under variable conditions.

| Solvent | KI (g) | Time (h) | Temp (°C) | $S_{\text{BET}}$ (m <sup>2</sup> /g) | MPV<br>(cm <sup>3</sup> /g) | PV<br>(cm <sup>3</sup> /g) |
|---------|--------|----------|-----------|--------------------------------------|-----------------------------|----------------------------|
| DMF     | 0.8    | 48       | 120       | 680                                  | 0.16                        | 0.39                       |
| DMF     | 3.0    | 48       | 120       | 754                                  | 0.13                        | 0.50                       |
| DMF     | 5.0    | 48       | 120       | 903                                  | 0.12                        | 0.54                       |
| DMAc    | 0.8    | 48       | 120       | 751                                  | 0.18                        | 0.41                       |
| DMAc    | 5.0    | 48       | 120       | 988                                  | 0.22                        | 0.62                       |
| DMAc    | 10     | 48       | 120       | 712                                  | 0.13                        | 0.42                       |

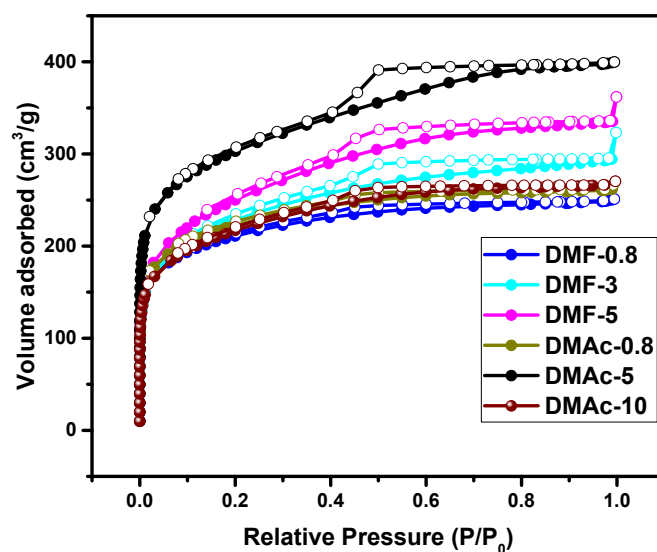

**Figure S6.** Nitrogen adsorption and desorption isotherms under the different reaction conditions for the CMP-KIs open system method (the number indicates the mass of KI used).

## F. Synthesis conditions optimization of CMP-KI-1 under solvothermal conditions

**Table S2** Synthesis of the S-CMP-KI-1 under variable conditions.

| Solvent                | KI (g) | Time (h) | Temp (°C) | $S_{\text{BET}}$ (m <sup>2</sup><br>g <sup>-1</sup> ) | MPV (cm <sup>3</sup><br>g <sup>-1</sup> ) | PV (cm <sup>3</sup> g <sup>-1</sup> ) |
|------------------------|--------|----------|-----------|-------------------------------------------------------|-------------------------------------------|---------------------------------------|
| DMF/THF                | 0.8    | 72       | 150       | 1068                                                  | 0.91                                      | 1.28                                  |
| DMF/o-DCB              | 0.8    | 72       | 150       | 1103                                                  | 0.98                                      | 1.05                                  |
| NMP/mesitylene         | 0.8    | 72       | 150       | 1076                                                  | 0.86                                      | 0.98                                  |
| CH <sub>3</sub> OH/THF | 0.8    | 72       | 150       | 142                                                   | 0.05                                      | --                                    |
| DMF                    | 0.3    | 72       | 150       | 952                                                   | 0.72                                      | 0.83                                  |
| DMF                    | 0.8    | 72       | 150       | 1346                                                  | 0.017                                     | 1.41                                  |
| DMF                    | 1.2    | 72       | 150       | 1469                                                  | 1.02                                      | 1.12                                  |
| DMAc                   | 1.2    | 72       | 150       | 1170                                                  | 0.70                                      | 0.78                                  |
| DMF                    | 1.8    | 72       | 150       | 1151                                                  | 0.78                                      | 0.90                                  |
| DMF                    | 3.0    | 72       | 150       | 1477                                                  | 1.00                                      | 1.08                                  |
| DMF                    | 4.0    | 72       | 150       | 1161                                                  | 0.88                                      | 1.04                                  |

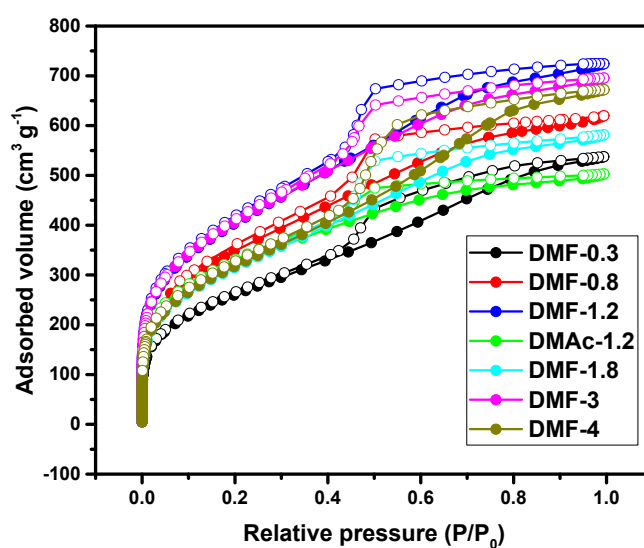

**Figure S7.** Nitrogen adsorption and desorption isotherms under the different reaction conditions for the CMP-KIs under solvothermal method (the number is the mass of KI used).

G. FT-IR and  $^{13}\text{C}$  NMR of corresponding monomer or model molecular and CMP-KIs

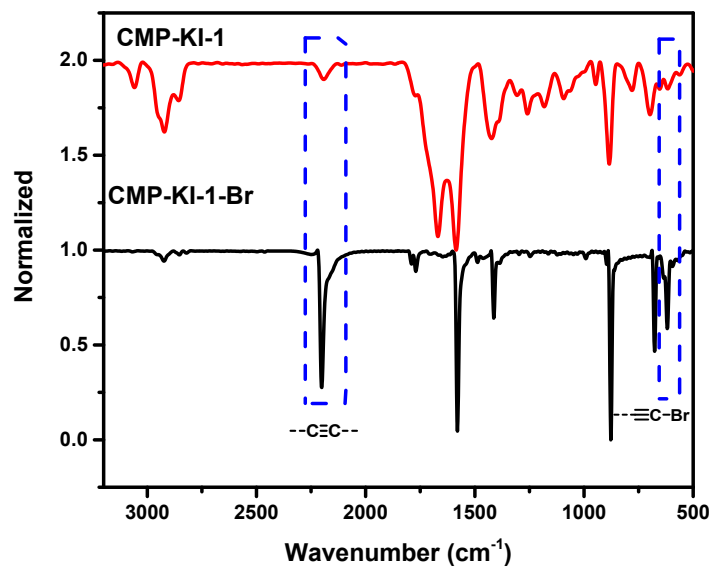

Figure S8. FT-IR spectrum of CMP-KI-1 (red) and corresponding monomer (black).

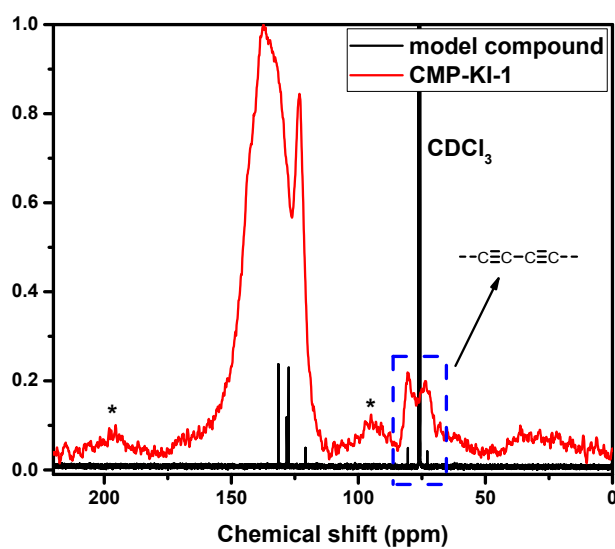

Figure S9.  $^{13}\text{C}$  NMR spectrum of CMP-KI-1 (red) in the solid state and model compound in  $\text{CDCl}_3$  (black).

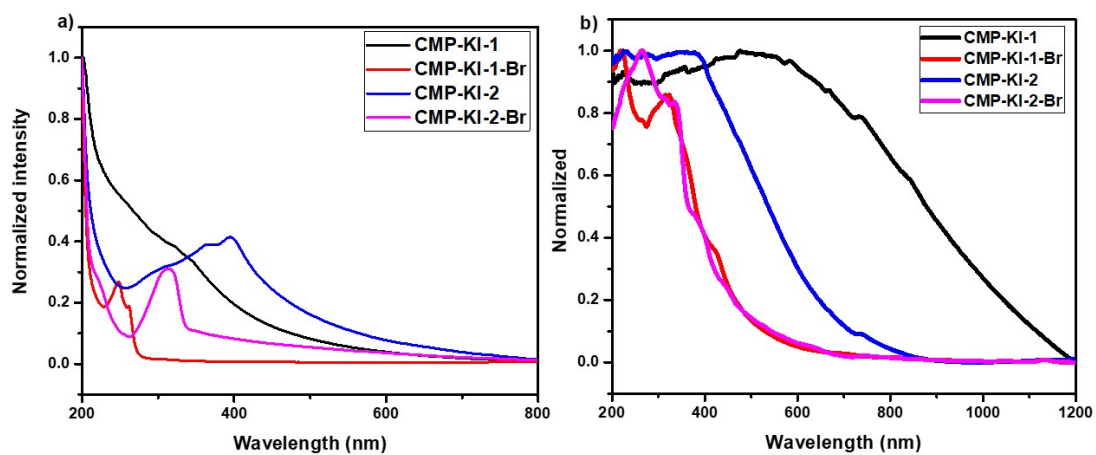

**Figure S10.** UV-vis adsorption spectrum of CMP-KIs and corresponding monomers a) solution in ethanol, b) UV-Visible diffuse reflectance spectrum.

## G. XPS spectra

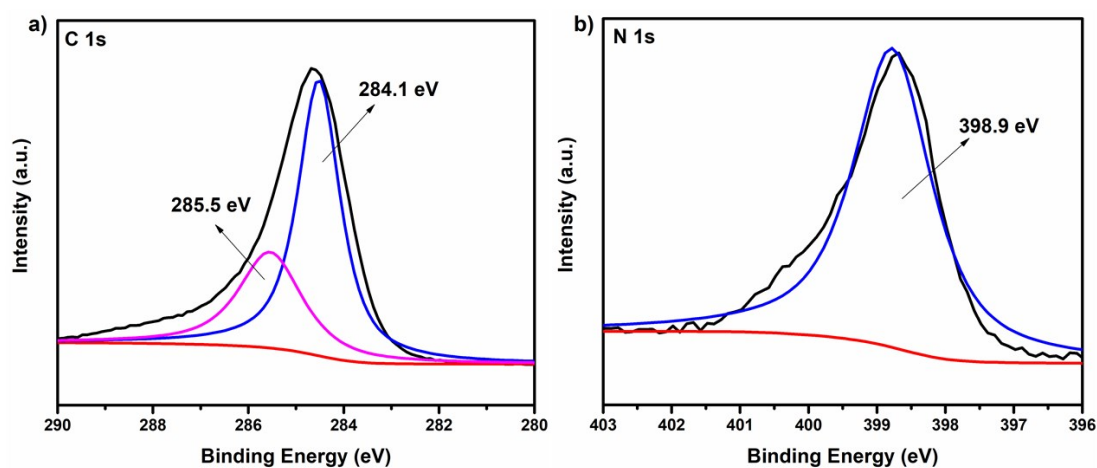

**Figure S11.** X-ray photoelectronic spectroscopy of a) C1s of CMP-KI-1, b) N1s of CMP-KI-2.

## K. TGA and DSC curves of CMP-KIs

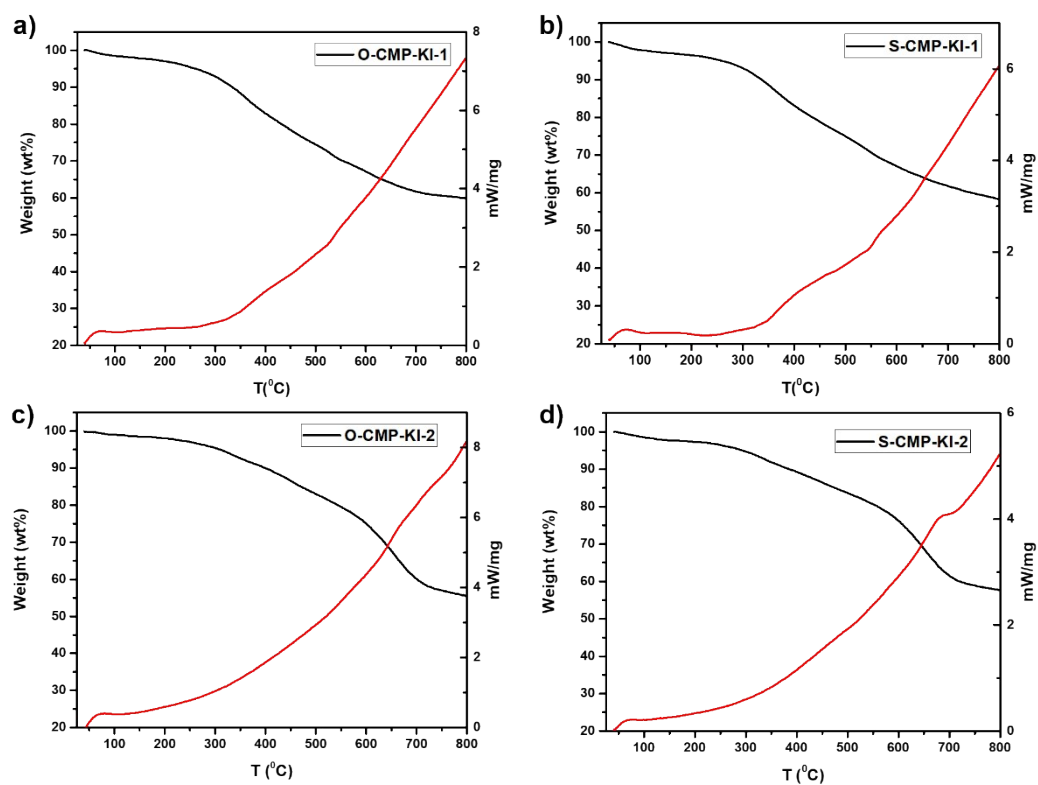

**Figure S12.** TGA (black) and DSC (red) curves of CMP-KIs.

## L. SEM images and PXRD patterns

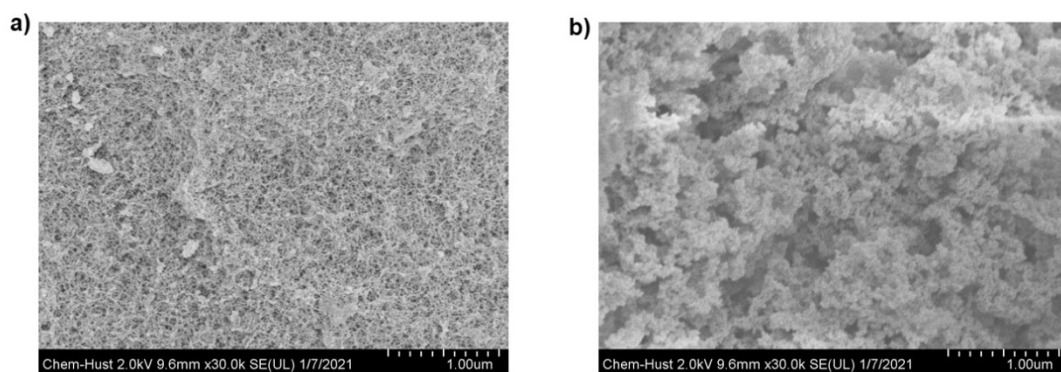

**Figure S13.** SEM images for CMP-KI-1 (a) and CMP-KI-2 (b).

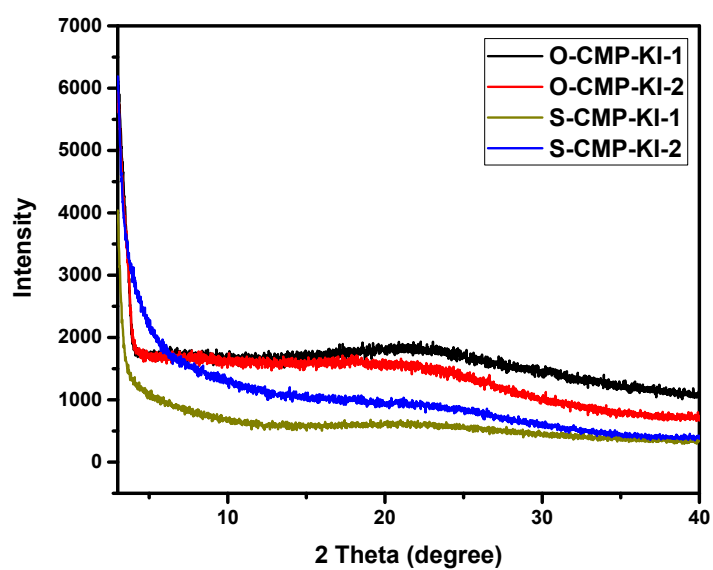

**Figure S14.** PXRD patterns of O-CMP-KI-1 (black), O-CMP-KI-2 (red), S-CMP-KI-1 (dark yellow) and S-CMP-KI-2 (blue).

### M. CO<sub>2</sub> uptake and heat of adsorption

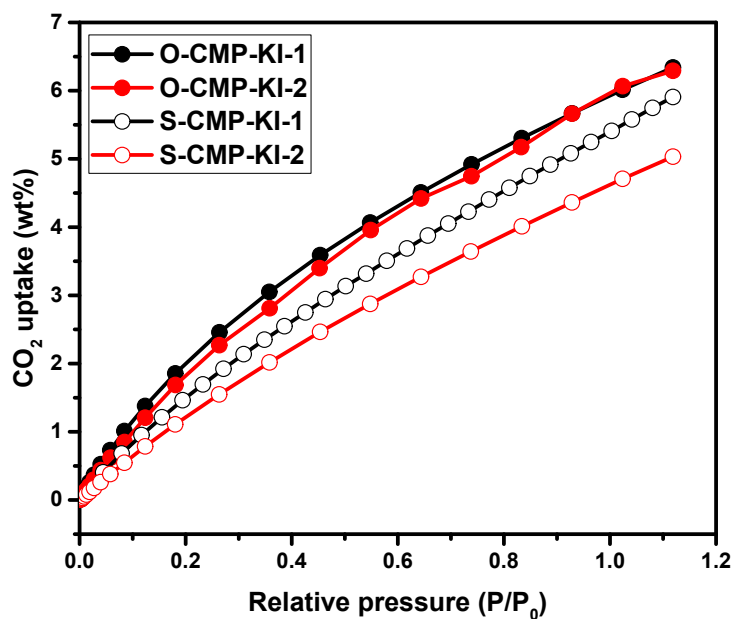

Figure S15. The CO<sub>2</sub> adsorption curves of CMP-KIs at 298 K.

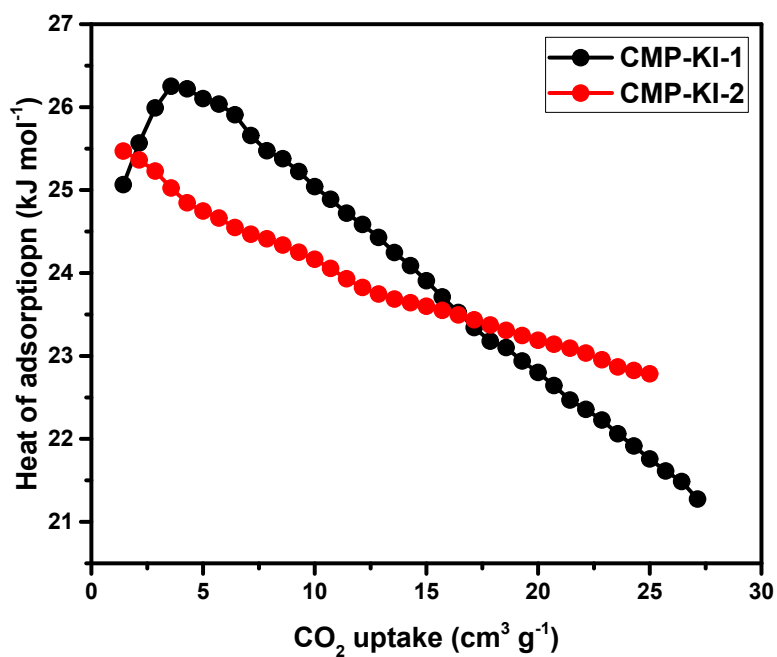

Figure S16. The adsorption heat of CO<sub>2</sub> for CMP-KIs.

## N. Comparing between this work and reported literatures

**Table S3** Summary of BET surface areas for some reported CMPs and CMP-KIs in this work.

| CMPs       | $S_{\text{BET}}$ ( $\text{m}^2 \text{g}^{-1}$ ) | $S_{\text{micro}}$ ( $\text{m}^2 \text{g}^{-1}$ ) | Ref.             |
|------------|-------------------------------------------------|---------------------------------------------------|------------------|
| CMP-3      | 522                                             | 350                                               | [2]              |
| HCMP-1     | 842                                             | 177                                               | [3]              |
| HCMP-2     | 827                                             | 324                                               | [3]              |
| NCMP-4     | 546                                             | 327                                               | [4]              |
| P5         | 520                                             | --                                                | [5]              |
| PPV        | 761                                             | --                                                | [6]              |
| HPOP-2     | 742                                             | 328                                               | [7]              |
| E2         | 488                                             | 430                                               | [8]              |
| CMP_60     | 660                                             | --                                                | [9]              |
| 1DPC-M3    | 753                                             | 594                                               | [10]             |
| FeP-CMP    | 1270                                            | --                                                | [11]             |
| P6         | 1152                                            | --                                                | [12]             |
| P5-CMP-1   | 400                                             | 198                                               | [13]             |
| O-CMP-KI-1 | 988                                             | 411                                               | <i>This work</i> |
| O-CMP-KI-2 | 774                                             | 319                                               | <i>This work</i> |
| S-CMP-KI-1 | 1477                                            | 1439                                              | <i>This work</i> |
| S-CMP-KI-2 | 1388                                            | 813                                               | <i>This work</i> |

**Table S4.** Summary of the CO<sub>2</sub> uptake capacity of some reported porous materials and this work.

| Polymer                               | S <sub>BET</sub> (m <sup>2</sup> g <sup>-1</sup> ) | CO <sub>2</sub> uptake <sup>a</sup> (wt%) | Ref.             |
|---------------------------------------|----------------------------------------------------|-------------------------------------------|------------------|
| Polymer 1B                            | 897                                                | 9.0                                       | [14]             |
| Polymer 4                             | 826                                                | 9.5                                       | [14]             |
| InCz-HCP1                             | 750                                                | 9.9                                       | [15]             |
| BDPCMP-2                              | 582                                                | 9.9                                       | [16]             |
| COF-102                               | 3620                                               | 6.9                                       | [17]             |
| PAF-1                                 | 5460                                               | 9.2                                       | [18]             |
| Azo-1                                 | 571                                                | 9.42                                      | [19]             |
| CMP-1-(CH <sub>3</sub> ) <sub>2</sub> | 899                                                | 4.1                                       | [20]             |
| CMP-1-COOH                            | 522                                                | 7.0                                       | [20]             |
| HAT-CTF-400                           | 17                                                 | 11.8                                      | [21]             |
| P1M                                   | 4                                                  | 4.1                                       | [12]             |
| CMP-1-COOH                            | 522                                                | 7.22                                      | [22]             |
| O-CMP-KI-1                            | 988                                                | 11.03                                     | <i>This work</i> |
| O-CMP-KI-2                            | 774                                                | 10.54                                     | <i>This work</i> |
| S-CMP-KI-1                            | 1477                                               | 10.45                                     | <i>This work</i> |
| S-CMP-KI-2                            | 1388                                               | 9.07                                      | <i>This work</i> |

<sup>a</sup> Data obtained at 1.13 bar and 273 K.

**Table S5.** Summary of the H<sub>2</sub> uptake capacity of some reported porous materials and this work.

| Polymer    | S <sub>BET</sub> (m <sup>2</sup> g <sup>-1</sup> ) | H <sub>2</sub> uptake <sup>a</sup> (wt%) | Ref.             |
|------------|----------------------------------------------------|------------------------------------------|------------------|
| Polymer 5  | 438                                                | 0.64                                     | [14]             |
| ILCOF-1    | 2723                                               | 1.3                                      | [23]             |
| CTV-COF-2  | 1170                                               | 0.65                                     | [24]             |
| MM3        | 1884                                               | 1.43                                     | [25]             |
| BLP-1(Br)  | 503                                                | 0.68                                     | [26]             |
| PSN-2      | 1042                                               | 1.00                                     | [27]             |
| O-CMP-KI-1 | 988                                                | 0.81                                     | <i>This work</i> |
| O-CMP-KI-2 | 774                                                | 0.96                                     | <i>This work</i> |
| S-CMP-KI-1 | 1477                                               | 0.92                                     | <i>This work</i> |
| S-CMP-KI-2 | 1388                                               | 1.30                                     | <i>This work</i> |

<sup>a</sup> H<sub>2</sub> uptake determined volumetrically using a Micromeritics ASAP 2020 M analyzer at 1 bar and 77 K.

## O. Elemental analysis

**Table S6.** Elemental analysis of CMP-KIs.

| EA (wt%) | CMP-KI-1 |      | CMP-KI-2 |      |
|----------|----------|------|----------|------|
|          | Exp.     | Cal. | Exp.     | Cal. |
| C        | 73.5     | 77.3 | 68.7     | 77.3 |
| H        | 3.3      | 3.2  | 3.9      | 2.9  |
| N        | 0        | 0    | 11.0     | 15.0 |

## P. References

- [1] Chen, Z.; Jiang, H.; Wang, A.; Yang, S. Transition-Metal-Free Homocoupling of 1-Haloalkynes: A Facile Synthesis of Symmetrical 1,3-Diynes. *J. Org. Chem.* **2010**, 75, 6700.
- [2] Jiang, J.; Su, F.; Trewin, A.; Wood, C. D.; Campbell, N. L.; Niu, H.; Dickinson, C.; Ganin, A. Y.; Rosseinsky, M. J.; Khimyak, Y. Z.; Cooper, A. I. Conjugated Microporous Poly(aryleneethynylene) Networks. *Angew. Chem. Int. Ed.* **2007**, 46, 8574.
- [3] Jiang, J.; Su, F.; Niu, H.; Wood, C. D.; Campbell, N. L.; Khimyak, Y. Z.; Cooper, A. I. Conjugated microporous poly(phenylene butadiynylene)s. *Chem. Commun.* **2008**, 4, 486.
- [4] Schmidt, J.; Werner, M.; Thomas, A. Conjugated Microporous Polymer Networks via Yamamoto Polymerization. *Macromolecules* **2009**, 42, 4426.
- [5] Kobayashi, N.; Kijima, M. Microporous materials derived from two- and three-dimensional hyperbranched conjugated polymers by thermal elimination of substituents. *J. Mater. Chem.* **2007**, 17, 4289.
- [6] Dawson, R.; Su, F.; Niu, H.; Wood, C. D.; Jones, J. T. A.; Khimyak, Y. Z.; Cooper, A. I. Mesoporous Poly(phenylenevinylene) Networks. *Macromolecules* **2008**, 41, 1591.
- [7] Chen, Q.; Luo, M.; Wang, T.; Wang, J.; Zhou, D.; Han, Y.; Zhang, C.; Yan, C.; Han, B. Porous Organic Polymers Based on Propeller-Like Hexaphenylbenzene Building Units. *Macromolecules* **2011**, 44, 5573.
- [8] Stöckel, E.; Wu, X.; Trewin, A.; Wood, C. D.; Clowes, R.; Campbell, N. L.; Jones, J. T. A.; Khimyak, Y. Z.; Adams, D. J.; Cooper, A. I. High surface area amorphous microporous poly(aryleneethynylene) networks using tetrahedral carbon- and silicon-centred monomers. *Chem. Commun.* **2009**, 2, 212.
- [9] Zhang, K.; Kopetzki, D.; Seeberger, P. H.; Antonietti, M.; Vilela, F. Surface Area Control and Photocatalytic Activity of Conjugated Microporous Poly(benzothiadiazole) Networks. *Angew. Chem. Int. Ed.* **2013**, 52, 1432.
- [10] He, Y.; Gehrig, D.; Zhang, F.; Lu, C.; Zhang, C.; Cai, M.; Wang, Y.; Laquai, F.; Zhuang, X.; Feng, X. Highly Efficient Electrocatalysts for Oxygen Reduction Reaction Based on 1D Ternary Doped Porous Carbons Derived from Carbon Nanotube Directed Conjugated Microporous Polymers. *Adv. Funct. Mater.* **2016**, 26, 8255.

- [11] Chen, L.; Yang, Y.; Jiang, D. L. CMPs as Scaffolds for Constructing Porous Catalytic Frameworks: A Built-in Heterogeneous Catalyst with High Activity and Selectivity Based on Nanoporous Metalloporphyrin Polymers. *J. Am. Chem. Soc.* **2010**, 132, 9138.
- [12] Ren, S.; Bojdys, M. J.; Dawson, R.; Laybourn, A.; Khimyak, Y. Z.; Adams, D. J.; Cooper, A. I. Porous, Fluorescent, Covalent Triazine-Based Frameworks Via Room-Temperature and Microwave-Assisted Synthesis. *Adv. Mater.* **2012**, 24, 2357.
- [13] Talapaneni, S. N.; Kim, D.; Barin, G.; Buyukcakir, O.; Je, S. H.; Coskun, A. Pillar [5] Arene Based Conjugated Microporous Polymers for Propane/Methane Separation through Host-Guest Complexation. *Chem. Mater.* **2016**, 28, 4460.
- [14] Li, B.; Gong, R.; Wang, W.; Huang, X.; Zhang, W.; Li, H.; Hu, C.; Tan B. A New Strategy to Microporous Polymers: Knitting Rigid Aromatic Building Blocks by External Cross-Linker. *Macromolecules* **2011**, 44, 2410.
- [15] Chang, D.; Yu, M.; Zhang, C.; Zhao, Y.; Kong, R.; Xie, F.; Jiang, J. Indolo[3,2-b] carbazole-containing hypercrosslinked microporous polymer networks for gas storage and separation. *Micropor. Mesopor. Mater.* **2016**, 228, 231.
- [16] Xu, Y.; Chang, D.; Feng, S.; Zhang, C.; Jiang, J. BODIPY-containing porous organic polymers for gas adsorption. *New J. Chem.* **2016**, 40, 9415.
- [17] Furukawa, H.; Yaghi, O. M. Storage of Hydrogen, Methane, and Carbon Dioxide in Highly Porous Covalent Organic Frameworks for Clean Energy Applications. *J. Am. Chem. Soc.* **2009**, 131, 8875.
- [18] Ben, T.; Pei, C.; Zhang, D.; Xu, J.; Deng, F.; Jing X.; Qiu, S. Gas storage in porous aromatic frameworks (PAFs). *Energy Environ. Sci.* **2011**, 4, 3991.
- [19] Xu, Y.; Li, Z.; Zhang, F.; Zhuang, X.; Zeng, Z.; Wei, J. New nitrogen-rich azo-bridged porphyrinconjugated microporous networks for high performance of gas capture and storage. *RSC Adv.* **2016**, 6, 30048.
- [20] Dawson, R.; Adams, D. J.; Cooper, A. I. Chemical tuning of CO<sub>2</sub> sorption in robust nanoporous organic polymers. *Chem. Sci.* **2011**, 2, 1173.
- [21] Zhu, X.; Tian, C.; Veith, G. M.; Abney, C. W.; Dehaudt, J.; Dai, S. *In Situ* Doping Strategy for the Preparation of Conjugated Triazine Frameworks Displaying Efficient CO<sub>2</sub> Capture Performance. *J. Am. Chem. Soc.* **2016**, 138, 11497.

- [22] Dawson, R.; St€ockel, E.; Holst, J. R.; Adams, D. J.; Cooper, A. I. Microporous organic polymers for carbon dioxide capture. *Energy Environ. Sci.* **2011**, 4, 4239.
- [23] Rabbani, M. G.; Sekizkardes, A. K.; Kahveci, Z.; Reich, T. E.; Ding, R.; El-Kaderi, H. M. A 2D Mesoporous Imine-Linked Covalent Organic Framework for High Pressure Gas Storage Applications. *Chem. Eur. J.* **2013**, 19, 3324.
- [24] Song, J.; Sun, J.; Liu, J.; Huang, Z.; Zheng, Q. Thermally/hydrolytically stable covalent organic frameworks from a rigid macrocyclic host. *Chem. Commun.* **2014**, 50, 788.
- [25] Dey, S.; Bhunia, A.; Breitzke, H.; Groszewicz, P. B.; Buntkowsky, G.; Janiak, C. Two linkers are better than one: enhancing CO<sub>2</sub> capture and separation with porous covalent triazine-based frameworks from mixed nitrile linkers. *J. Mater. Chem. A* **2017**, 5, 3609.
- [26] Reich, T. E.; Jackson, K. T.; Li, S.; Jena, P.; El-Kaderi, H. M. Synthesis and characterization of highly porous borazine-linked polymers and their performance in hydrogen storage application. *J. Mater. Chem.* **2011**, 21, 10629.
- [27] Dawson, R.; Cooper, A. I.; Adams, D. J. Nanoporous organic polymer networks. *Prog. Polym. Sci.* **2012**, 37, 530.
